# Supplementary material for: Changes in plasma protein levels as an early indication of a bloodstream infection
Source: PLoS One. 2017 Feb 24;12(2):e0172987. doi: 10.1371/journal.pone.0172987 (PMC5325609; doi:10.1371/journal.pone.0172987)
Supplement: S2 Table — Pathway name, Source, Number of overlapping genes, accession of overlapping genes, number of all pathway genes, P-value and Q values of enrichment are given in the table. This table is for protein list when the highest mean was set to the case. Another list of highest mean control is given in next worksheet in the same file. (XLSX) [file pone.0172987.s002.xlsx]

## Sheet: Pathways Highest mean Case
Supplementary Table 2: Pathway over-representation analysis results are shown in the table. Pathway name, Source, Number of overlapping genes, accession of overlapping genes, number of all pathway genes, P-value and Q values of enrichment are given in the table. This table is for protein list when the highest mean was set to the case. Another list of highest mean control is given in next workshee…
pathway_name	pathway_source	num_overlapping_genes	overlapping_genes	num_all_pathway_genes	P_genes	Q_genes
Complement and coagulation cascades - Homo sapiens (human)	KEGG	7	P08697;P01023;P02671;P02675;P01024;P01009;P01008	69 (69)	6.47e-08	0.000253
Complement and Coagulation Cascades	Wikipathways	6	P08697;P01023;P02675;P01008;P01009;P01024	54 (54)	3.48e-07	0.000679
Platelet degranulation	Reactome	6	P08697;P01023;P02671;P02675;P02787;P01009	81 (83)	3.92e-06	0.0051
Response to elevated platelet cytosolic Ca2+	Reactome	6	P08697;P01023;P02671;P02675;P02787;P01009	86 (88)	5.56e-06	0.00543
Scavenging of heme from plasma	Reactome	3	P00738;P00739;P02790	12 (13)	2.96e-05	0.0231
Formation of Fibrin Clot (Clotting Cascade)	Reactome	4	P01023;P02671;P02675;P01008	39 (39)	4.98e-05	0.0264
GRB2:SOS provides linkage to MAPK signaling for Integrins	Reactome	3	P12931;P02671;P02675	15 (15)	6.05e-05	0.0264
p130Cas linkage to MAPK signaling for integrins	Reactome	3	P12931;P02671;P02675	15 (15)	6.05e-05	0.0264
Initial triggering of complement	Reactome	4	A0M8Q6;P01859;P01024;P01861	41 (72)	6.08e-05	0.0264
Urokinase-type plasminogen activator (uPA) and uPAR-mediated signaling	PID	4	P12931;P02671;P02675;P18084	44 (45)	8.06e-05	0.0315
Platelet activation_ signaling and aggregation	Reactome	7	P08697;P01023;P02671;P02675;P02787;P01009;P12931	223 (231)	0.000159	0.045
Ardeparin Action Pathway	SMPDB	3	P02671;P02675;P01008	21 (21)	0.000173	0.045
Heparin Action Pathway	SMPDB	3	P02671;P02675;P01008	21 (21)	0.000173	0.045
Fondaparinux Action Pathway	SMPDB	3	P02671;P02675;P01008	21 (21)	0.000173	0.045
Enoxaparin Action Pathway	SMPDB	3	P02671;P02675;P01008	21 (21)	0.000173	0.045
Blood Clotting Cascade	Wikipathways	3	P08697;P02671;P02675	22 (22)	0.000199	0.0458
Common Pathway	Reactome	3	P02671;P02675;P01008	22 (22)	0.000199	0.0458

## Sheet: Pathways Highest mean Control
pathway_name	pathway_source	num_overlapping_genes	overlapping_genes	num_all_pathway_genes	P_genes	Q_genes
Scavenging of heme from plasma	Reactome	3	P02760;O14791;P02647	12 (13)	6.47e-06	0.0144
Binding and Uptake of Ligands by Scavenger Receptors	Reactome	4	P0DJI8;P02760;O14791;P02647	40 (43)	7.39e-06	0.0144
